# Supplementary material for: Zinc/Nickel exchange and ligand cannibalism in N2S2O1,2 donor ligand sets
Source: Royal Society of Chemistry journal article supplement (doi:10.1039/b914422f), 2009-01-01
Supplement: b914422f.pdf [file b914422f.pdf]

## Supplementary Materials for

### Zinc/Nickel Exchange and Ligand Cannibalism in $N_2S_2O_{1,2}$ Donor Ligand Sets

Elky Almaraz, Jason A. Denny, William S. Foley, Joseph H. Reibenspies, Nattamai Bhuvanesh, Marcetta Y. Darensbourg\*

*Department of Chemistry, Texas A&M University, College Station, Texas 77843*

\* To whom correspondence should be addressed. E-mail: [marcetta@mail.chem.tamu.edu](mailto:marcetta@mail.chem.tamu.edu)

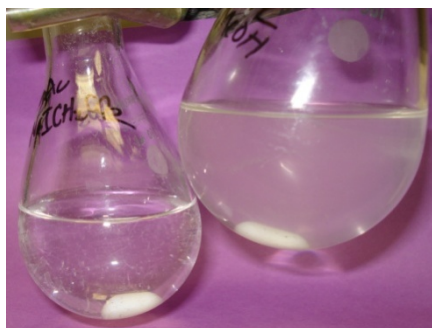

**Figure S1.** Schlenk flasks containing the reaction mixtures from synthetic route (b) on the left and route (b') on the right were photographed against a colored background to highlight the clear and cloudy makeup of each colorless solution.

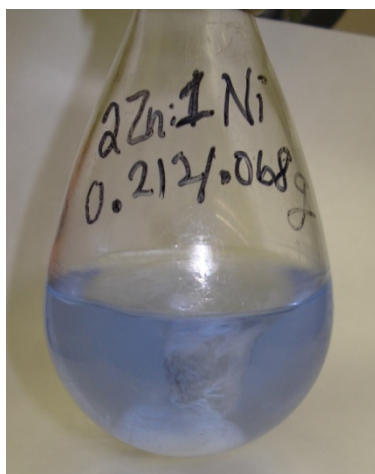

**Figure S2.** Reaction flask containing the 2 Zn: 1 Ni zinc displacement reaction solution in CH<sub>3</sub>OH. The blue color was observed upon immediate addition of the light green Ni to the colorless Zn solution.

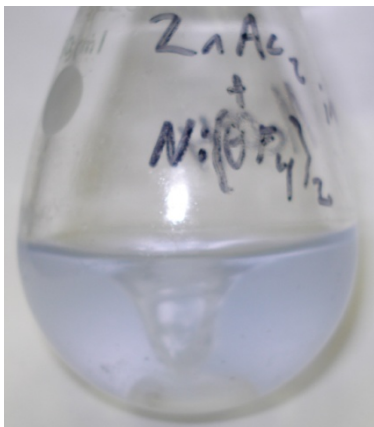

**Figure S3.** A Schlenk flask containing the zinc displacement reaction of Ni(BF<sub>4</sub>)<sub>2</sub> (light green) with Zn-1'-Ac<sub>2</sub> (colorless) in CH<sub>3</sub>OH. The blue color was observed after approx. 30 min of reaction time.

**Table S1.** Selected Bond Lengths (Å) for [Zn-1']<sub>2</sub>, Zn-1'-Ac, and Zn-1'-Ac<sub>2</sub>.

|                      | [Zn-1'] <sub>2</sub> | Zn-1'-Ac | Zn-1'-Ac <sub>2</sub> |
|----------------------|----------------------|----------|-----------------------|
| Zn(1) – S(thiolate)  | 2.307*<br>2.496**    | 2.263    | --                    |
| Zn(1) – S(thioether) | --                   | 2.587    | 2.552<br>2.601        |
| Zn(1) – O(1)         | --                   | 1.983    | 2.039<br>2.044        |

\* terminal thiolate, \*\* bridging thiolate

**Table S2.** Summary of Crystallographic Data.

|                                                                     | Zn-1'-Ac <sub>2</sub>                                                           | Ni-1'-Ac <sub>2</sub>                                                           |
|---------------------------------------------------------------------|---------------------------------------------------------------------------------|---------------------------------------------------------------------------------|
| empirical formula                                                   | C <sub>15</sub> H <sub>30</sub> N <sub>2</sub> O <sub>6</sub> S <sub>2</sub> Zn | C <sub>13</sub> H <sub>28</sub> N <sub>2</sub> O <sub>7</sub> S <sub>2</sub> Ni |
| formula weight                                                      | 463.90                                                                          | 447.20                                                                          |
| temperature (K)                                                     | 110(2)                                                                          | 110(2)                                                                          |
| wavelength (Å)                                                      | 1.54178                                                                         | 0.71073                                                                         |
| <i>Z</i>                                                            | 2                                                                               | 4                                                                               |
| <i>D</i> <sub>calcd</sub> (g / cm <sup>3</sup> )                    | 1.559                                                                           | 1.610                                                                           |
| $\mu$ (mm <sup>-1</sup> )                                           | 4.001                                                                           | 1.315                                                                           |
| crystal system                                                      | Triclinic                                                                       | Monoclinic                                                                      |
| space group                                                         | P-1                                                                             | P2(1)                                                                           |
| <i>a</i> (Å)                                                        | 7.5042(14)                                                                      | 7.731(2)                                                                        |
| <i>b</i> (Å)                                                        | 8.0905(15)                                                                      | 7.703(2)                                                                        |
| <i>c</i> (Å)                                                        | 16.774(4)                                                                       | 30.984(9)                                                                       |
| $\alpha$ (°)                                                        | 78.684(11)                                                                      | 90                                                                              |
| $\beta$ (°)                                                         | 81.945(11)                                                                      | 90.282(5)                                                                       |
| $\gamma$ (°)                                                        | 86.515(10)                                                                      | 90                                                                              |
| <i>V</i> (Å <sup>-3</sup> )                                         | 988.2(3)                                                                        | 1845.1(9)                                                                       |
| Goodness-of-fit                                                     | 1.067                                                                           | 1.003                                                                           |
| R1 <sup>a</sup> , wR2 <sup>b</sup> (%) [ <i>I</i> > 2σ( <i>I</i> )] | 0.0368, 0.0982                                                                  | 0.0572, 0.1238                                                                  |
| R1 <sup>a</sup> , wR2 <sup>b</sup> (%) (all data)                   | 0.0415, 0.1005                                                                  | 0.0629, 0.1290                                                                  |

<sup>a</sup> R1 =  $\sum||F_o| - |F_c||/\sum F_o$ . <sup>b</sup> wR2 =  $[\sum[w(F_o^2 - F_c^2)^2]/\sum w(F_o^2)^2]^{1/2}$ .
